# Supplementary material for: Methane plasma-mediated phase engineering of Ni nanosheets for alkaline hydrogen evolution
Source: Royal Society of Chemistry journal article supplement (doi:10.1039/d2nr01525k), 2022-01-01
Supplement: d2nr01525k1.pdf [file d2nr01525k1.pdf]

## Supplementary Materials

### **Methane plasma-mediated phase engineering of Ni nanosheets for alkaline hydrogen evolution**

Wenxiu Yan,<sup>a</sup> Chao An,<sup>a</sup> Yongli Shen,<sup>a</sup> Shuyuan Zeng,<sup>\*b</sup> and Changhua An<sup>\*a</sup>

<sup>a</sup> Tianjin Key Laboratory of Organic Solar Cells and Photochemical Conversion, School of Chemistry and Chemical Engineering, Tianjin Key Laboratory of Advanced Functional Porous Materials, Institute for New Energy Materials & Low-Carbon Technologies, Tianjin University of Technology, Tianjin 300384, China

<sup>b</sup> School of Chemistry and Chemical Engineering, Liaocheng University, Liaocheng, Shandong 252059, China.

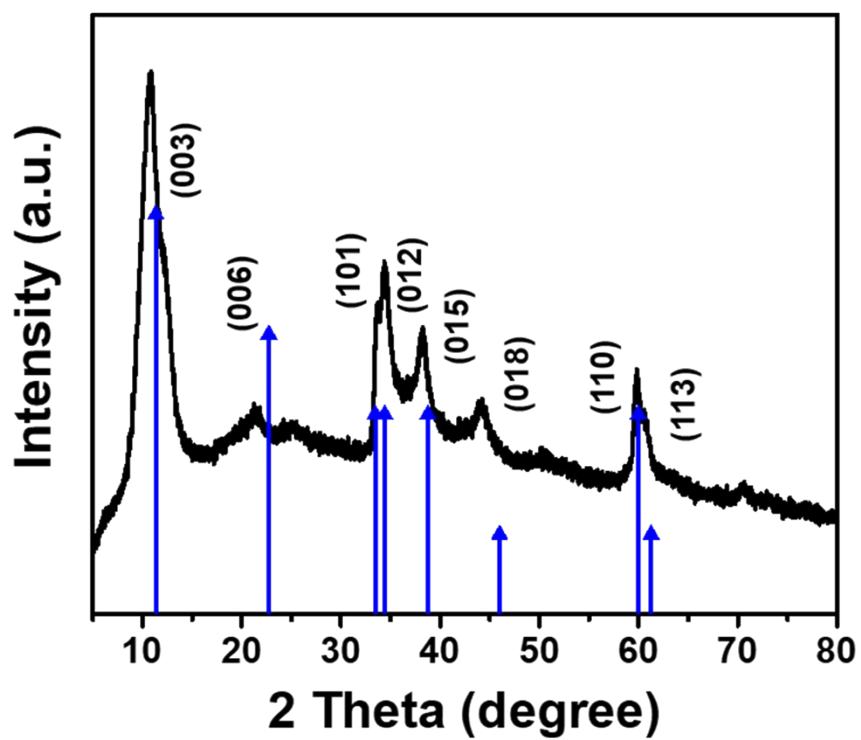

Figure S1. XRD pattern of Ni(OH)<sub>2</sub>.

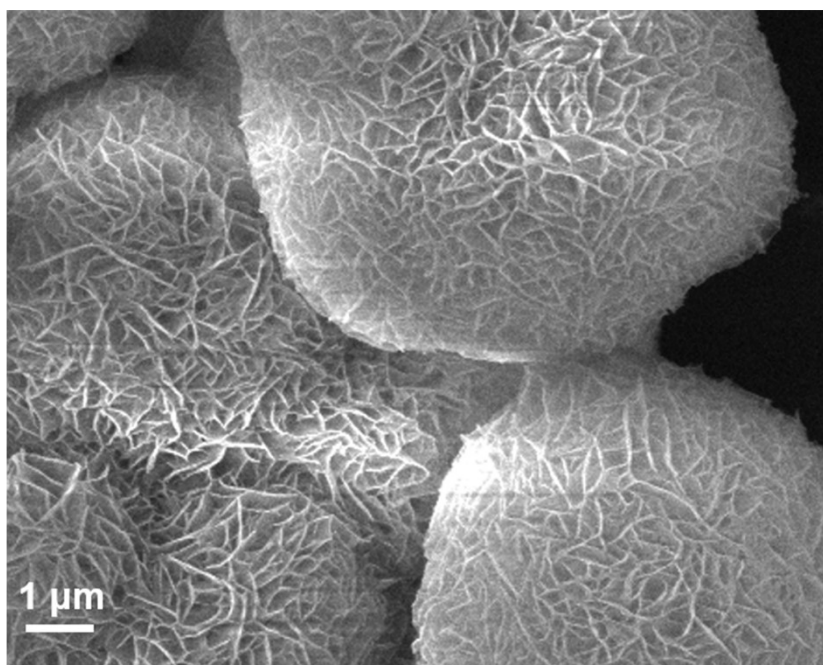

Figure S2. Low and high-magnified SEM image of Ni(OH)<sub>2</sub>.

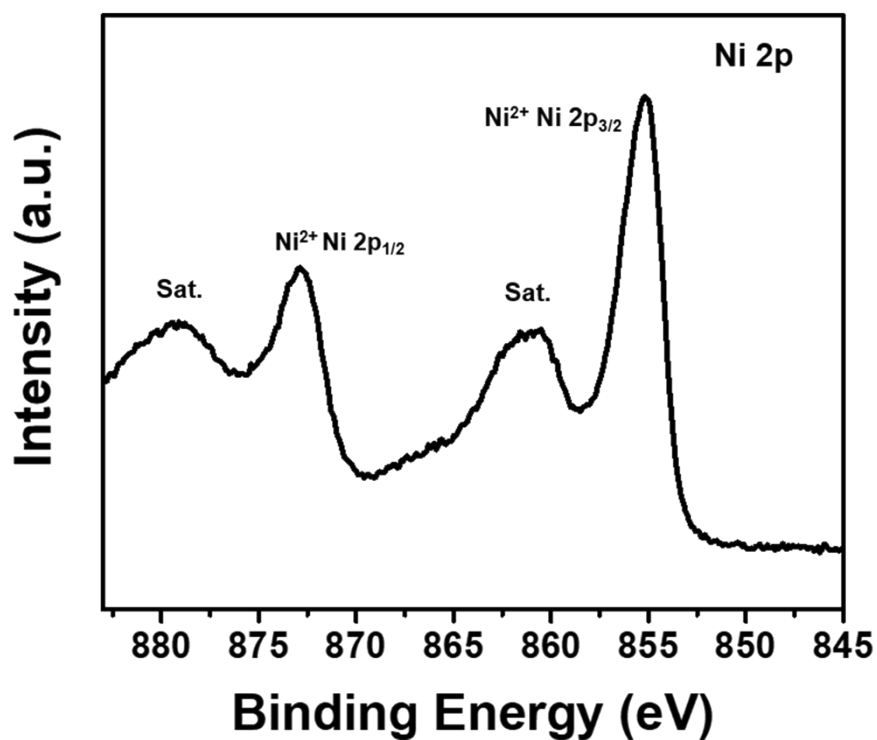

Figure S3. Survey XPS spectrum of Ni(OH)<sub>2</sub>.

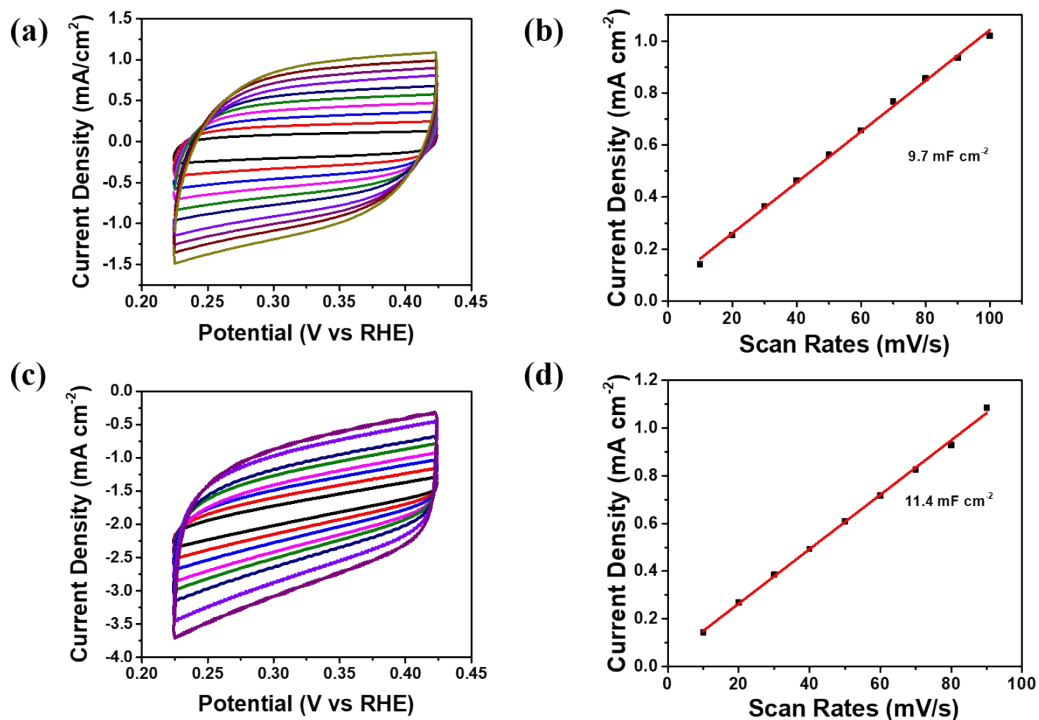

Figure S4. CV curves of fcc Ni (a), and hcp Ni (c) in the non-Faradic region vs various scan rates; and the plot of capacitive currents vs scan rates for fcc Ni (b), hcp Ni (d).

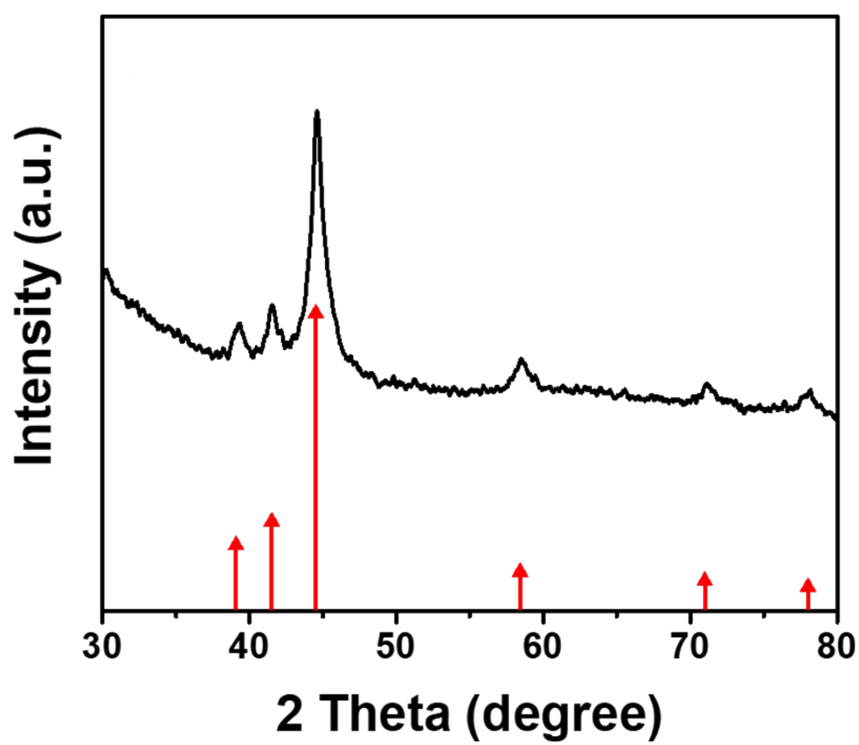

**Figure S5.** XRD pattern of hcp Ni after testing 15 h.

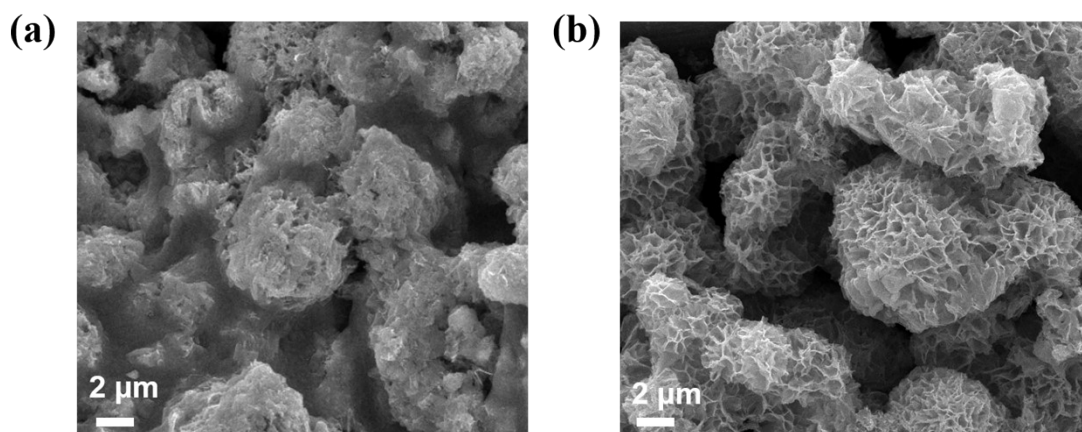

**Figure S6.** SEM images of (a) fcc Ni, (b) hcp Ni after long-term HER test.

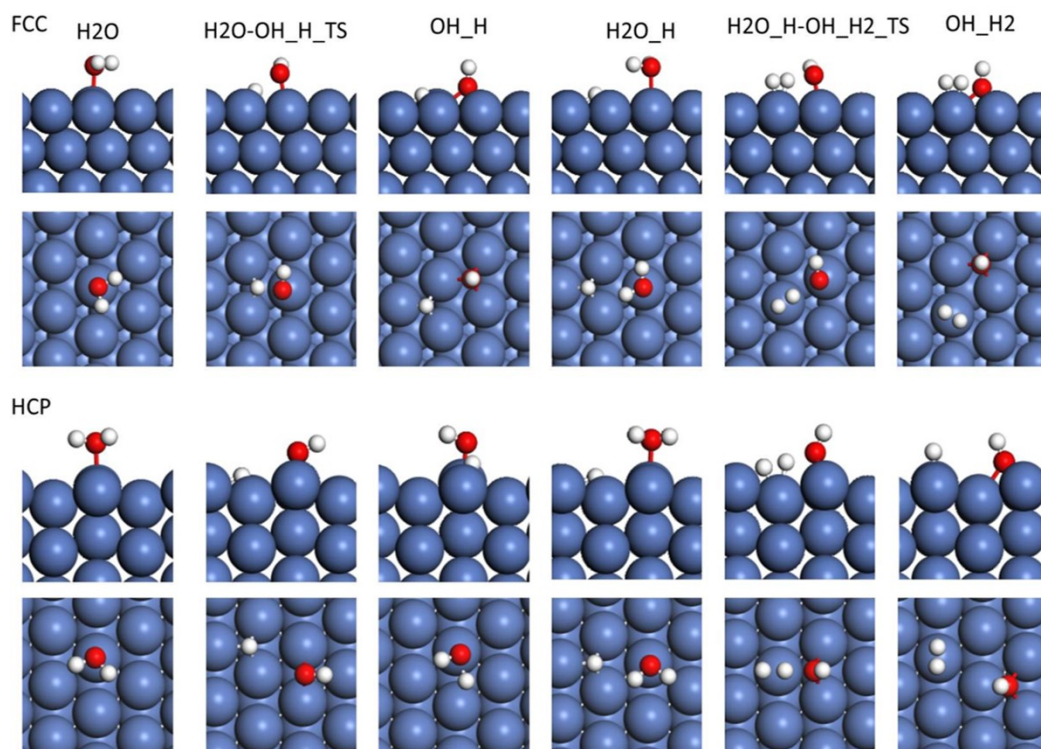

**Figure S7.** Stable structures for the reactants, products and transition states of the H<sub>2</sub> formation on fcc Ni and hcp Ni.

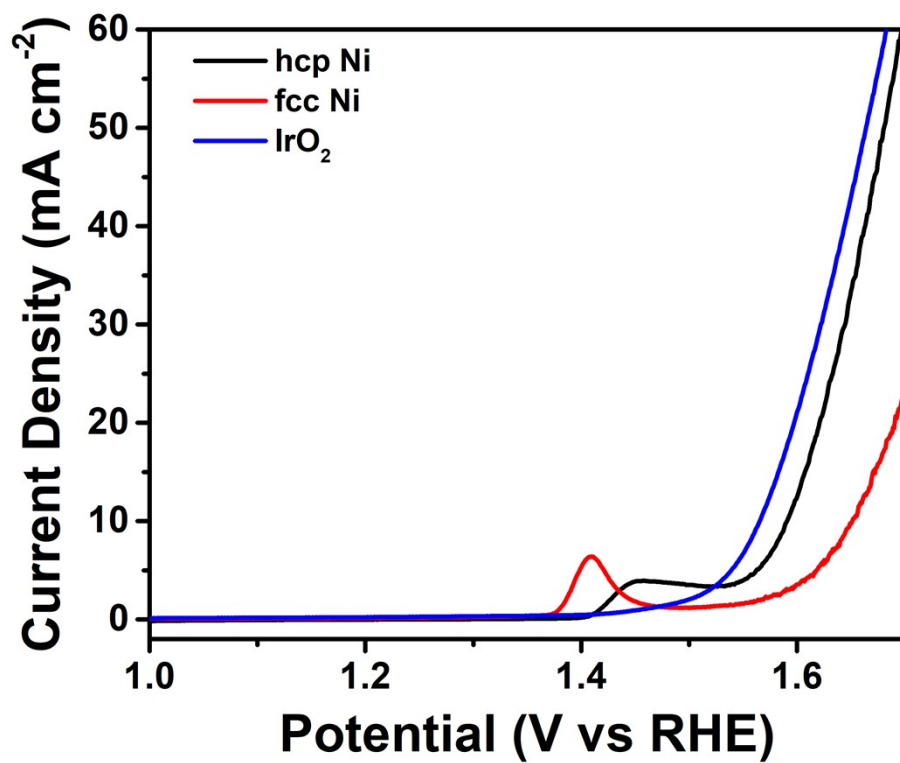

Figure S8. LSV polarization curves of electrocatalytic OER evaluation on hcp Ni and fcc Ni.

Table S1. Comparison of HER performance with similar reported catalysts.

| Catalyst                                                                          | Electrolyte      | Overpotential (mV) | J/mA cm <sup>-2</sup> | Ref.             |
|-----------------------------------------------------------------------------------|------------------|--------------------|-----------------------|------------------|
| Ni@SNG                                                                            | 1.0 M KOH        | 99.8               | 10                    | 1                |
| Ni <sub>3</sub> S <sub>4</sub> /g-C <sub>3</sub> N <sub>4</sub> /N-doped graphene | 1.0 M KOH        | 95                 | 10                    | 2                |
| V <sub>s</sub> -Ni <sub>3</sub> S <sub>2</sub> /NF                                | 1.0 M KOH        | 88                 | 10                    | 3                |
| Ni/NC-0.35                                                                        | 1.0 M KOH        | 133                | 10                    | 4                |
| Ni/TM                                                                             | 1.0 M KOH        | 190                | 10                    | 5                |
| Ni-N <sub>x</sub>                                                                 | 1.0 M KOH        | 147                | 10                    | 6                |
| Ag-Ni <sub>3</sub> S <sub>2</sub>                                                 | 1.0 M KOH        | 89                 | 10                    | 7                |
| Ni/M-MoS <sub>2</sub>                                                             | 1.0 M KOH        | 145                | 10                    | 8                |
| N-Ni <sub>3</sub> S <sub>2</sub>                                                  | 1.0 M KOH        | 155                | 10                    | 9                |
| MoS <sub>2</sub> /Fe <sub>5</sub> Ni <sub>4</sub> S <sub>8</sub>                  | 1.0 M KOH        | 120                | 10                    | 10               |
| <b>hcp Ni</b>                                                                     | <b>1.0 M KOH</b> | <b>85</b>          | <b>10</b>             | <b>This work</b> |

### References.

1. Chunfei Zhang, Shenghong Ju, Tong-Hyun Kang, Gisang Park, Byong-June Lee, He Miao, Yunwen Wu, Jinliang Yuan, and Jong-Sung Yu. *ACS Appl. Mater. Interfaces*, 2021, **13**, 4294–4304.
2. Jing Yang, Shiqi Xing, Jianbin Zhou, Yun Cheng, Lei Shi, Qing Yang. *J. Mater. Chem. A*, 2019, **7**, 3714-3728.
3. Dongbo Jia, Lili Han, Ying Li, Wenjun He, Caichi Liu, Jun Zhang, Cong Chen, Hui Liu, Huolin L. Xin. *J. Mater. Chem. A*, 2020, **8**, 18207.
4. Qi Wang, Tao Sun, Bin Xue. *Applied Surface Science*, 2021, **564**, 150439.
5. Zhongping Yao, Jiankang Wang, Yajing Wang, Taiping Xie, Chunyan Li, Zhaohua Jiang. *Electrochimica Acta*, 2021, **382**, 138342.
6. Chaojun Lei, Yu Wang, Yang Hou, Pan Liu, Jian Yang, Tao Zhang, Xiaodong Zhuang, Mingwei Chen, Bin Yang, Lecheng Lei, Chris Yuan, Ming Qiu, Xinliang Feng. *Energy Environ. Sci.*, 2019, **12**, 149.
7. Caichi Liu, Fangqing Wang, Dongbo Jia, Jingqian Zhang, Jingyu Zhang, Qiuyan Hao, Jun Zhang, Ying Li, Hui Liu. *Nanoscale*, 2020, **12**, 19333.
8. Nuwan H. Attanayake, Lakshay Dheer, Akila C. Thenuwara, Sasitha C. Abeyweera, Coby Collins, Umesh V. Waghmare, Daniel R. Strongin. *ChemElectroChem*, 2020, **7**, 3606-3615.
9. Tianyi Kou, Tyler Smart, Bin Yao, Irwin Chen, David Thota, Yuan Ping, Yat Li. *Adv. Energy Mater.*, 2018, **8**, 1703538.
10. Yi Wu, Fan Li, Wenlong Chen, Qian Xiang, Yanling Ma, Hong Zhu, Peng Tao, Chengyi Song, Wen Shang, Tao Deng, and Jianbo Wu. *Advanced Materials*, 2018, **30**, 1803151.
